# Supplementary material for: A strategy to increase rebaudioside A content based on one-step bioconversion of Stevia extract to steviol
Source: Royal Society of Chemistry journal article supplement (doi:10.1039/d3gc00548h), 2023-01-01
Supplement: d3gc00548h1.pdf [file d3gc00548h1.pdf]

## Supplementary information

### A strategy to increase rebaudioside A content based on one-step bioconversion of Stevia extract to steviol

Yu Lin,<sup>†a</sup> Manman Wen,<sup>†a</sup> Qing Lan,<sup>a</sup> Yu Yin,<sup>a</sup> Ribo Huang,<sup>\*a,b</sup> Hao Pang,<sup>b</sup> Hang Wei<sup>a</sup> and Liqin Du<sup>\*a</sup>

---

<sup>a</sup>State Key Laboratory for Conservation and Utilization of Subtropical Agro-bioresources, Guangxi Research Center for Microbial and Enzymatic Technology, College of Life Science and Technology, Guangxi University, Daxue Road No. 100, Nanning, Guangxi 530005, China.

<sup>b</sup>Guangxi Key Laboratory of Bio-refinery, National Engineering Research Center for Non-Food Biorefinery, State Key Laboratory of Non-Food Biomass and Enzyme Technology, Guangxi Academy of Sciences, Daling Road No. 98, Nanning, Guangxi 530007, China.

\*Corresponding authors, E-mail: [duliqin@gxu.edu.cn](mailto:duliqin@gxu.edu.cn) (L. Du), [guruace@163.com](mailto:guruace@163.com) (R. Huang).

<sup>†</sup>These authors contributed equally to this work.

## Supporting Figures

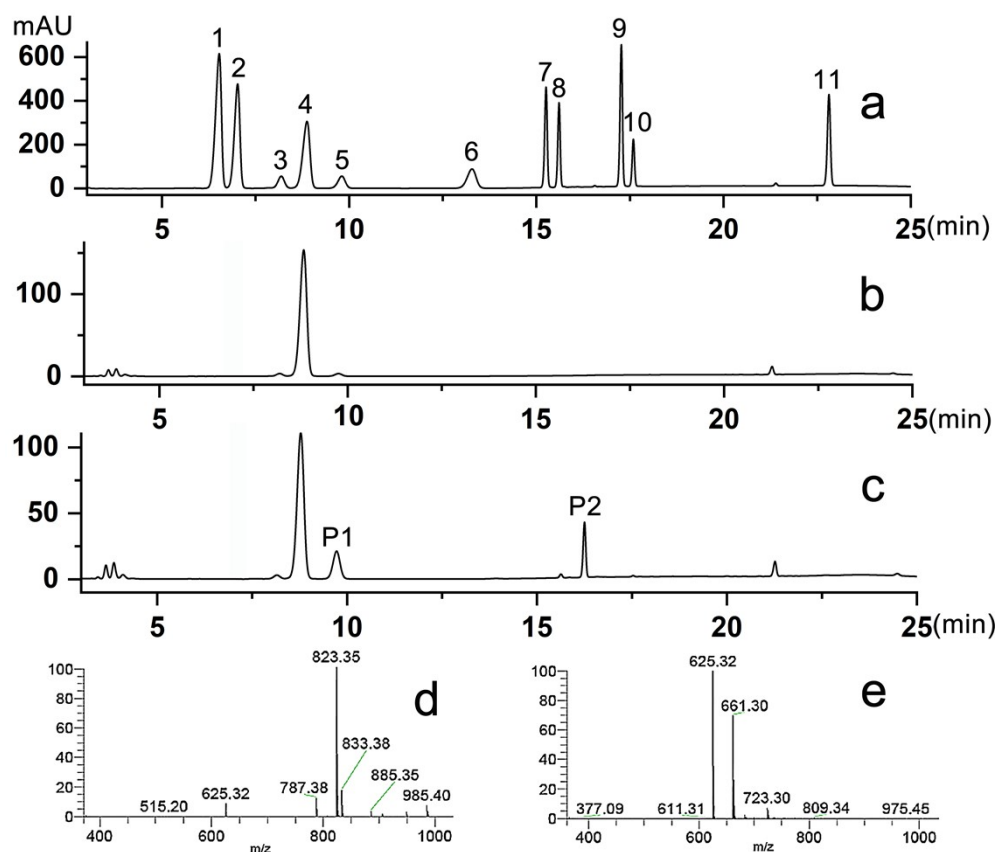

**Fig. S1** HPLC and MS analysis of RC hydrolysis by SBGL3. (a): Standard: RA (1), ST (2), rebaudioside F (3), RC (4), dulcoside A (5), RU (6), RB (7), steviolbioside (8), steviol 19-glycoside (9), steviolmonoside (10), SV (11); (b): RC standard; (c): RC was catalyzed by SBGL3; (d) and (e): The MS analysis of P1 and P2 marked in (c).

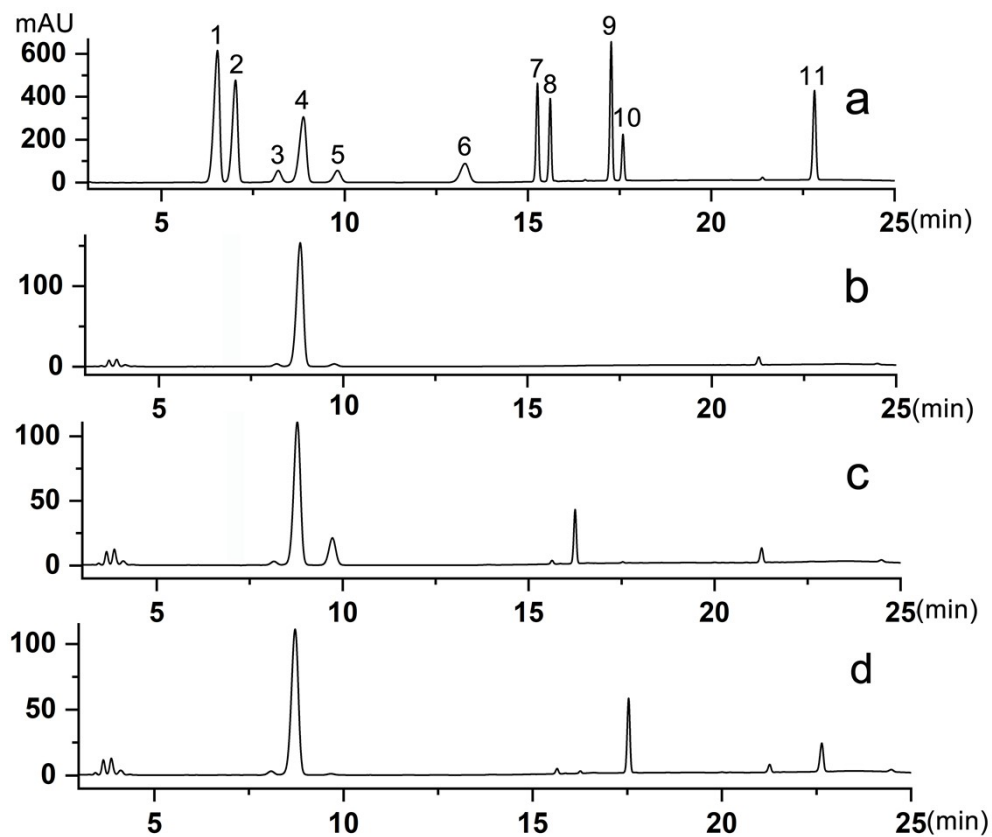

**Fig. S2** HPLC analysis of RC co-hydrolysis by SBGL3 and SPRHA2. (a): Standard: RA (1), ST (2), rebaudioside F (3), RC (4), dulcoside A (5), RU (6), RB (7), steviolbioside (8), steviol 19-glycoside (9), steviolmonoside (10), SV (11); (b): RC standard; (c): RC was catalyzed by SBGL3; (d): RC was co-hydrolyzed by SBGL3 and SPRHA2.

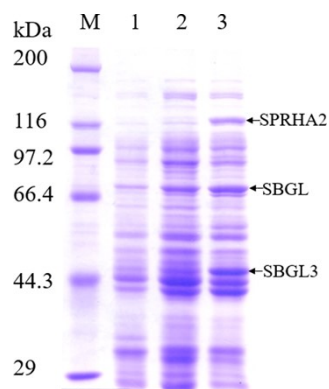

**Fig. S3** SDS-PAGE analysis of crude enzyme extracts of *E. coli* strain E1 and E2. Lane M: Protein Marker; Lane 1: Induced cell lysate of *E. coli* JM109 with pSE380; Lane 2

and 3: Induced cell lysate of *E.coli* strain E1 and E2, respectively.

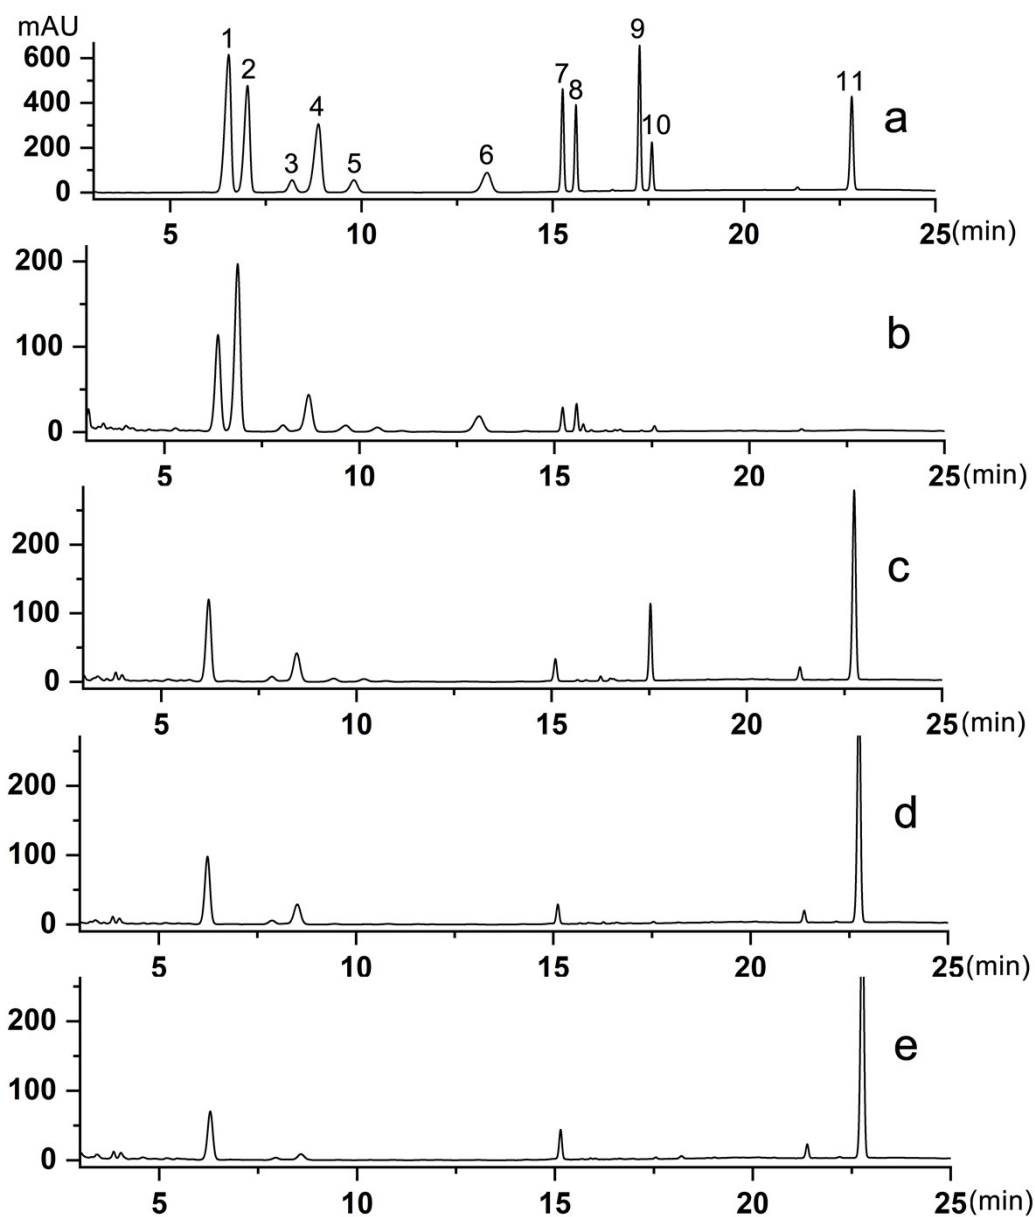

**Fig. S4** HPLC analysis of Stevia extract hydrolysis by crude enzyme extract of *E.coli* strain E4. (a): Standard: RA (1), ST (2), rebaudioside F (3), RC (4), dulcoside A (5), RU (6), RB (7), steviolbioside (8), steviol 19-glycoside (9), steviolmonoside (10), SV (11); (b): Stevia extract; (c-e): The dosage of crude enzyme extract was 5, 15, 65  $\mu$ L in the reactions, respectively.

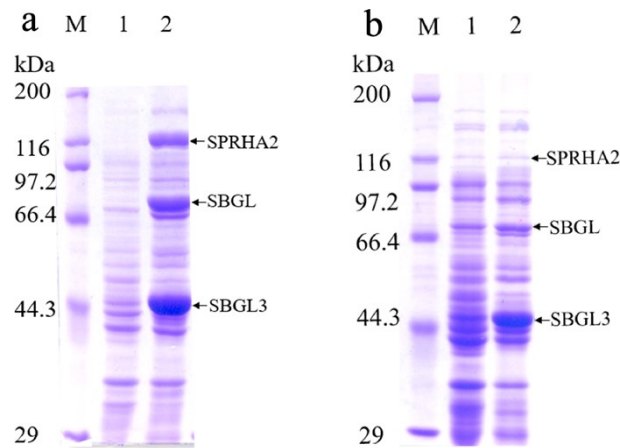

**Fig. S5** SDS-PAGE analysis of crude enzyme extracts of *E. coli* strain E3 (a) and E4 (b). (a): Lane M: Protein Marker; Lane 1: Induced cell lysate of *E. coli* BL21(DE3) with pRSFDuet-1 and pSE380; Lane 2: Induced cell lysate of *E. coli* strain E3. (b): Lane M: Standard protein Marker; Lane 1: Induced cell lysate of *E. coli* BL21 (DE3) with pRSFDuet-1 and pSE380; Lane 2: Induced cell lysate of *E. coli* strain E4.

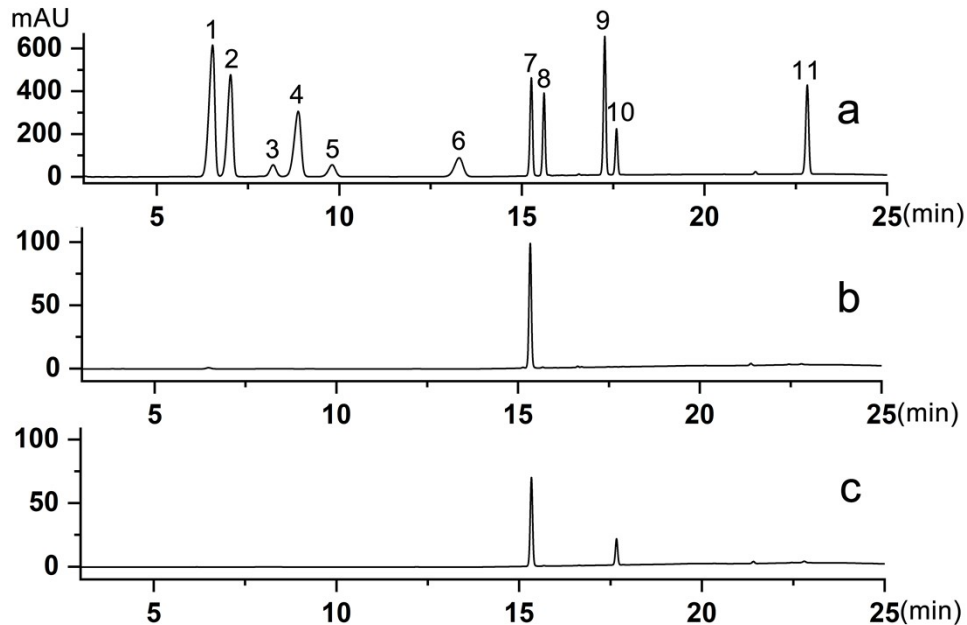

**Fig. S6** HPLC analysis of RB hydrolysis by SBGL2. (a): Standard: RA (1), ST (2), rebaudioside F (3), RC (4), dulcoside A (5), RU (6), RB (7), steviolbioside (8), steviol 19-glycoside (9), steviolmonoside (10), SV (11); (b): RB standard; (c): RB was catalyzed by SBGL2.

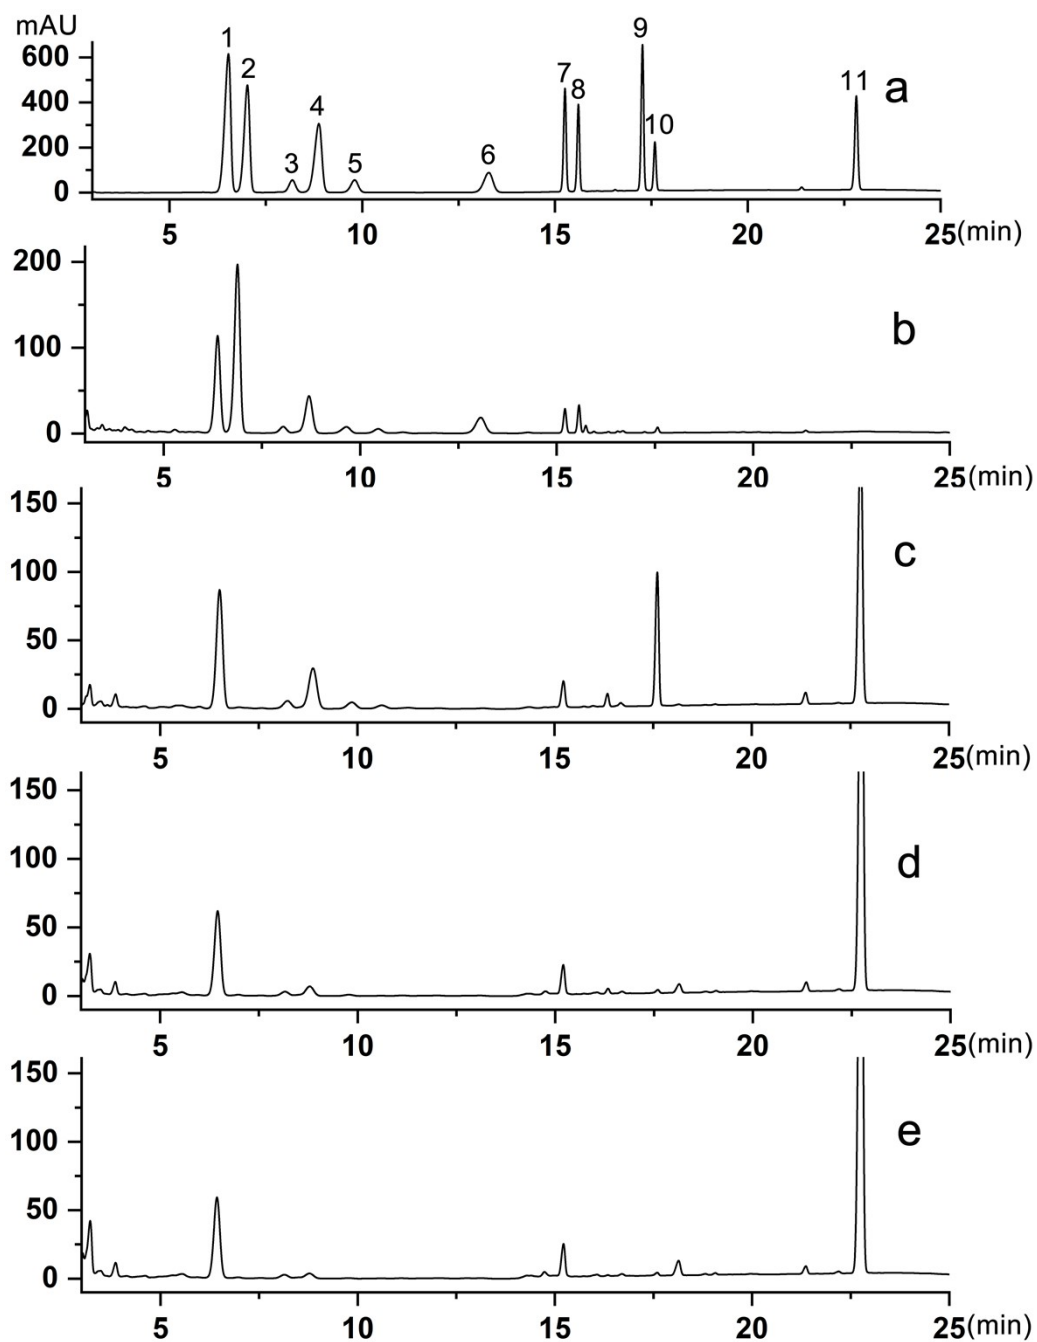

**Fig. S7** HPLC analysis of Stevia extract hydrolysis by crude enzyme extract of *E.coli* strain E5. (a): standard: RA (1), ST (2), rebaudioside F (3), RC (4), dulcoside A (5), RU (6), RB (7), steviolbioside (8), steviol 19-glycoside (9), steviolmonoside (10), SV (11); b: Stevia extract; (c-e): The dosage of crude enzyme extract was 5, 35, 65  $\mu\text{L}$  in the reactions, respectively.

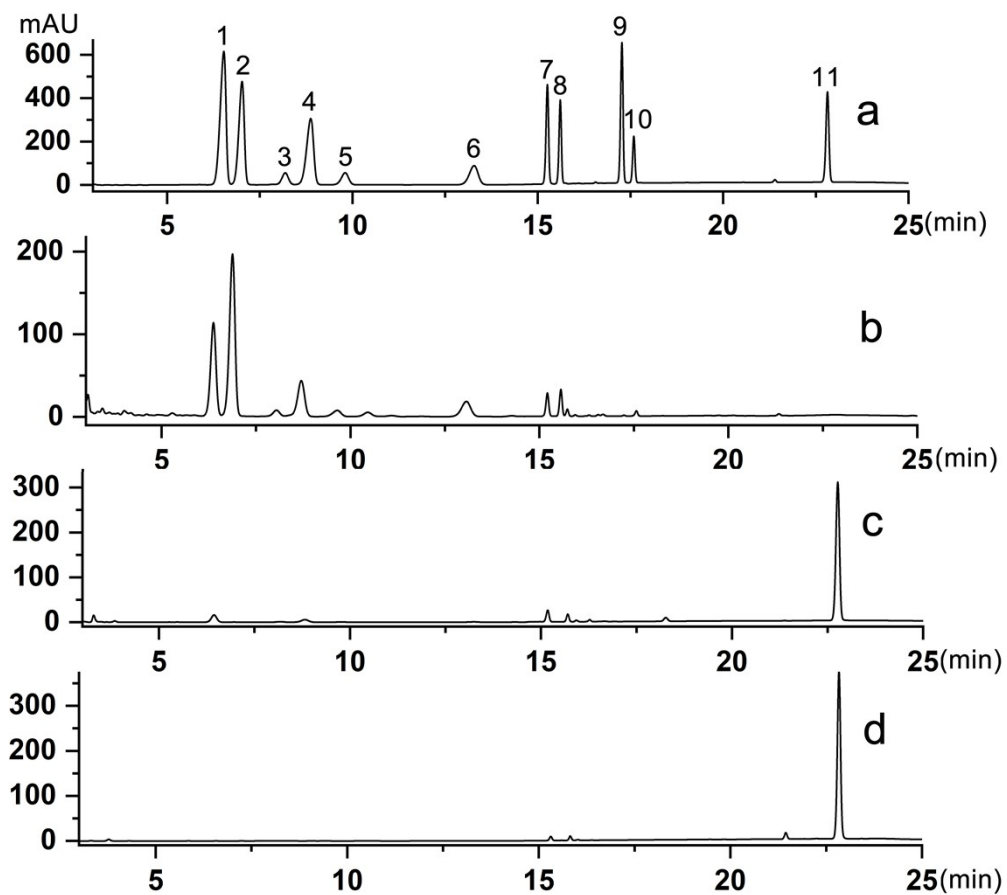

**Fig. S8** HPLC analysis of 10 mL reaction system for whole-cell catalysis. (a): Standard: RA (1), ST (2), rebaudioside F (3), RC (4), dulcoside A (5), RU (6), RB (7), steviolbioside (8), steviol 19-glycoside (9), steviolmonoside (10), SV (11); (b): Stevia extract; (c): Precipitate in the reaction; (d): Purified SV.

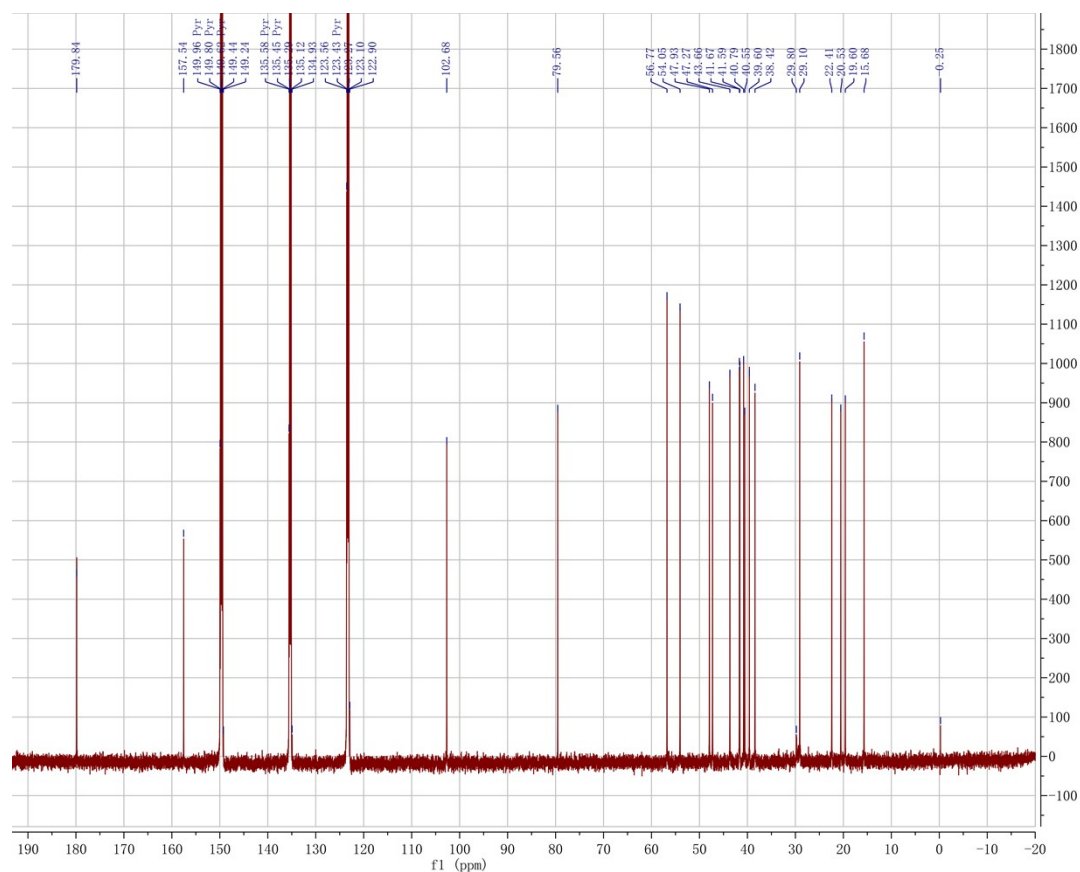

**Fig. S9** NMR spectrum of isolated steviol.  $^{13}\text{C}$  NMR (151 MHz, Pyridine-*d*5)  $\delta$  179.84 (C19, C), 157.54 (C16, C), 102.68 (C17, CH<sub>2</sub>), 79.56 (C13, C), 56.77 (C5, CH), 54.05 (C14, CH<sub>2</sub>), 47.93 (C9, CH), 47.27 (C4, CH<sub>2</sub>), 43.66 (C8, C), 41.67 (C15, CH<sub>2</sub>), 41.59 (C12, CH<sub>2</sub>), 40.79 (C1, CH<sub>2</sub>), 40.55 (C7, CH<sub>2</sub>), 39.60 (C10, CH), 38.42 (C3, CH<sub>2</sub>), 29.10 (C18, CH<sub>3</sub>), 22.41(C6, CH<sub>2</sub>), 20.53 (C11, CH<sub>2</sub>), 19.60 (C2, CH<sub>2</sub>), 15.68 (C20, CH<sub>3</sub>).



## Supporting table

**Table S1** Primers in this study.

| Primers | Sequence                                                                   |
|---------|----------------------------------------------------------------------------|
| 02-F    | 5'-ATAGGATCCAAGGTTGCCAAGGCTGCCGCTGCG-3'                                    |
| 02-R    | 5'-GGTAAGCTTTACACGCGATTGGCCCGCGGATC-3'                                     |
| 03-F    | 5'-TCAAGATCTATCGATCGACGCAGCCTGGTCACCT-3'                                   |
| 03-R    | 5'-TCTAAGCTTTACAGGCTGTTGCGCCGGGCGATG-3'                                    |
| 011-F   | 5'-GAACAAAACTCATCTCAGAAGAGGATCTG-3'                                        |
| 011-R   | 5'-AGCTTCAGCCTCTCTTTTCTCGAGAGATAC-3'                                       |
| 012-F   | 5'-GTATCTCTCGAGAAAAGAGAGGCTGAAGCTATGCTGCTCCAGGCGG<br>GTGCGCGGAAGCTG-3'     |
| 012-R   | 5'-CAGATCCTCTTCTGAGATGAGTTTTTGTCTCAGGCCAGTTCGAAGC<br>TGCCGGACACCCC-3'      |
| 021-F   | 5'-GTATCTCTCGAGAAAAGAGAGGCTGAAGCTATGCAGGAAGCCGGT<br>GCCCCGCCGG-3'          |
| 021-R   | 5'-CAGATCCTCTTCTGAGATGAGTTTTTGTCTCAATCCTTCCAGCTAC<br>GCGCCGGC-3'           |
| 031-F   | 5'-GTATCTCTCGAGAAAAGAGAGGCTGAAGCTATGCAAGAAGCCGGT<br>GCTCCTCCTGTAA-3'       |
| 031-R   | 5'-CAGATCCTCTTCTGAGATGAGTTTTTGTCTCAATCTTCCATGATC<br>TAGCTGGAAGTC-3'        |
| 0011-F  | 5'-GCTGGGCACGACCCGCTGACTCGAGAAGGAGATATACATATGCAG<br>GAAGCCGGT-3'           |
| 0011-R  | 5'-CATCGGGTGCCGGCTCCATAGATCTTCTGTTTCCTGTGTGAAATTGT<br>TATCCGCT-3'          |
| 0012-F  | 5'-GGAAGATCTATGGAGCCGGCACCCGATGCGGCCGCCA-3'                                |
| 0012-R  | 5'-TTCTCGAGTCAGCGGGTCGTGCCAGCGTGACCCGGGCCA-3'                              |
| 0021-F  | 5'-ATGGAGCCGGCACCCGATGCGGCCGCCA-3'                                         |
| 0021-R  | 5'-GCTCATTTCAGAATATTTGCCAGAACCG-3'                                         |
| 0022-F  | 5'-GCAAATATTCTGAAATGAGCCCCGGGTTGACAATTAATCATCCGGC<br>TCGTA-3'              |
| 0022-R  | 5'-GCATCGGGTGCCGGCTCCATATGTATATCTCCTTAGATCTTACAGG<br>CTGTTGCGCCGGGCGATG-3' |
| 0023-F  | 5'-GCAAATATTCTGAAATGAGCCCCGGGTCATAAAAAATTTATTTGCT<br>TTGTGA-3'             |
| 0023-R  | 5'-GCATCGGGTGCCGGCTCCATATGTATATCTCCTTAGATCTTACAGG<br>CTGTTGCGCCGGGCGATG-3' |
| 0031-F  | 5'-GGGGAATTCAATCGATCGACGCAGCCTGGTCACCT-3'                                  |
| 0031-R  | 5'-GGGAAGCTTTACAGGCTGTTGCGCCGGGCGATG-3'                                    |
| 0041-F  | 5'-GGAAGATCTAGAGCCGGCACCCGATGCGGCCGCCA-3'                                  |
| 0041-R  | 5'-TCGAGTCAGCGGGTCGTGCCAGCGTGACC-3'                                        |
| 0051-F  | 5'-GGAAGATCTAAAGGTTGCCAAGGCTGCCGCTGCGCCCAC-3'                              |
| 0051-R  | 5'-TTCTCGAGTCACACGCGATTGGCCCGCGGATCGCGCCCA-3'                              |

**Table S2** Plasmids and strains used in this study.

| Plasmids       | Backbone                  | Description                                               | References |
|----------------|---------------------------|-----------------------------------------------------------|------------|
| pSH1           | pSE380                    | pTrc- <i>spbgl1</i> , pRR322, Amp <sup>+</sup>            | 1          |
| pSH2           | pSE380                    | pTrc- <i>sbgl</i> , pRR322, Amp <sup>+</sup>              | 2          |
| pSH3           | pQE30                     | pT5- <i>sprha2</i> , pRR322, Amp <sup>+</sup>             | This study |
| pSH4           | pQE30                     | pT5- <i>sbgl2</i> , pRR322, Amp <sup>+</sup>              |            |
| pSH5           | pQE30                     | pT5- <i>sbgl3</i> , pRR322, Amp <sup>+</sup>              |            |
| pSH6           | pSE380                    | pTrc- <i>sbgl-spbgl1</i> , pRR322, Amp <sup>+</sup>       |            |
| pSH7           | pSH6                      | pTrc- <i>sbgl3-sprha2-sbgl</i> , pRR322, Amp <sup>+</sup> |            |
| pSH8           | pSH7                      | pT5- <i>sbgl3-sprha2-sbgl</i> , pRR322, Amp <sup>+</sup>  |            |
| pSH9           | pRSFDuet-1                | pT7- <i>sbgl3</i> , RSF, Kan <sup>+</sup>                 |            |
| pSH10          | pSH9                      | pT7- <i>sbgl3-T7-sprha2</i> , RSF, Kan <sup>+</sup>       |            |
| pSH11          | pSH2                      | pTrc- <i>sprha2-sbgl</i> , pRR322, Amp <sup>+</sup>       |            |
| pSH12          | pSH9                      | pT7- <i>sbgl3-T7-sbgl2</i> , RSF, Kan <sup>+</sup>        |            |
| <b>Strains</b> |                           |                                                           |            |
| C1             | <i>E. coli</i> JM109      | JM109 carrying pSH1                                       | This study |
| C2             | <i>E. coli</i> JM109      | JM109 carrying pSH2                                       |            |
| C3             | <i>E. coli</i> JM109      | JM109 carrying pSH3                                       |            |
| C4             | <i>E. coli</i> JM109      | JM109 carrying pSH4                                       |            |
| C5             | <i>E. coli</i> JM109      | JM109 carrying pSH5                                       |            |
| C6             | <i>E. coli</i> JM109      | JM109 carrying pSH6                                       |            |
| E1             | <i>E. coli</i> JM109      | JM109 carrying pSH7                                       |            |
| E2             | <i>E. coli</i> JM109      | JM109 carrying pSH8                                       |            |
| E3             | <i>E. coli</i> BL21 (DE3) | BL21 (DE3) carrying pSH2 and pSH10                        |            |
| E4             | <i>E. coli</i> BL21 (DE3) | BL21 (DE3) carrying pSH9 and pSH11                        |            |
| E5             | <i>E. coli</i> BL21 (DE3) | BL21 (DE3) carrying pSH11 and pSH12                       |            |

cggccaaattcccacgtgcatattgatcggcgcaagtgcggcagcggcatggcgcaagcccggcgcgcgatgctgctccagg  
 cgggtgcgcggaagctgcccgggcggtcgagtcgctgctcgcaagatgaccgtcgaggaaaaggccggcagctcacctgatggc  
 ggccgatggtccggcgcgggcggtgacgctgaaccggcggggtgctcgtccaatttcgacggccagctggcgaagtgcgccc  
 gggcggctgacggcggttcaacggcaacggggcgggatggcccagcgcatgcagacggtcgcatgcgcaatcccggctcagga  
 tccgctgctgttcggcgggacgtgatccacggcttccgcaccgtcttccgggtgctgatggcgaggcggcgagcttcgatcccgatctcg  
 ccgagcggaccgcgcgggtggcgggcggtggaggccgcggcctccggatcgactggaccttcgcccgatggtggacatcaccgcga

**The  
 codi  
 ng  
 seq  
 uen  
 ce  
 of  
 gen  
 es  
 in  
 this  
 stu  
 dy.  
 >spb  
 gl1  
 gtga  
 aaga**

tgcccgtggggtcgcagcgtggagggggcggcgaggacgtgctgctggcaagctgacgcggcgggcgggtgctggtccag  
ggcacaaggggctggaggcggcgatgctgctgcccgcctgccaagcatttcggcctatggcgcggcggaaggcggctggact  
acagcacggctgacatttcggagcggacgtgctgagacactatfcccggcttgaggcagcacttgcggcgggggcggcgacggta  
tggcctgttcaacgagctgctgggcatccccccaccgccaatgaatggctgctgacggaagtctgctgcccgaatggccttcgagg  
cgtcgtcgtcctccactataccggcagcaggaactgacgcgcacggttcggcgggatgctgctgagggcagccggctcgccttctg  
gcccgtgctgacatgagcatgacagcggcttctacatccgccactgcccggacctgctgccaaggcgaggtgcccgatggcgcggctg  
gacgagggggtgctgcccgggtactggcgtcaaggctcagctggcctgttcgacgatccgttcggcgatcggacgcccgggagaa  
ggcgcggtgctggacccccgcctctggcgtggcccgcgagggcgggctgctgctgacgtgatgctcaagaacgaggcagcctg  
ctgccgtcccgcctcgggcaagaagatcgcgtgacggcccgttcggcgggcggtgcatgaccggctgcccgtggaacgtctac  
ggcaccgatgccgaagcctgactggcagcagcgtcagggcgctggtgacgatccggcgctggtgacctaccgaaggcggg  
ggctcagcggcgatcggggcgggacgacggcggtggcgggcgggcgggcgggacgtcgtgctgctggcgtggcgga  
catcccgcctgcccggcagggcagctcgcctccgcaatgctgctcaccggcgagatggcactggcagagggcgtcgcagc  
cggcaagccgatggtggtgctcctccgcaacggcggcgctggcgtggagggggcggtgctgaaggcggcgatcctcgtcact  
ggctcctggatcacaggacggcccggcgatccgacgtgctgttcggcctgctggcccctggcgggctgcccgtctcctccgca  
ggcgagggggcagggcctatcattacgatcacaagcctaccggtcggcccaaccggcgggcgctgacaggagtacaagaccatt  
atcgcgagttcccgaaccaggcgtgttcccgttcggcgacgggctaacctatggcgacatcgcgtacggcgagttggacatggcgagg  
gcccgttgcggcagggcaagctgacggttcggcgacgatccaaccggggtcgcgtgcccggaggaagtggctcagctctac  
attcgcagctggcgcgagcgtgaccgcccgttcgcgagctaaaggccttfcggcgtggtggcctgacggcgagcggaaacg  
ggtggcgttacgctcaccggcggcactgctgttcacggcagggcgtcaagccgacggtcagcccggggcgggtccagctgtggatc  
gcccctcggcgaggcggagggggtgtccggcagcttcgaactggcctga

>sbgl

atgggcaagcaatttcttccggcgtggcgttctgctgctggggggcggcagcttcgggtggtggcgaggaagccgggtgcc  
ccgcccgtaaacctgcccggcggcgaagcgcgcggatcagaccgtcaaggcgatgaccggcagagcaccacgctgactcatg  
gcatcatggccatccagcttttccggcgccggcggatccccgaggatgcccgtgcccggcgcggggtatattgccgggttccgctc  
ggcgctgcccgcctcaagaaaccgacccagcctggcgctggcctgggtggcgggcgcgcaagcggggcgacagcgtgct  
cttcggcattgccagggcgaagctgggatcctccgtgctgacgatggcgggcgatgatcgtgcccgaagcgcgcgacggc  
tacaactgctgctggcgggtggcgtcaacctacgcgcgatccgcgcaatggccgacgttgaatatctgtcgaagatccgctgctgctg  
ggcgtgctggtggcgccgcatcgcggcagcagcctcaaccacatattccacgatcaagcattcgcgctcaacggcgagaaaccg  
ggcgagcagttctggacatccagatcgcgaatccccggcgcgcaagcggatctgctggttccagatggcagcagggccagc  
ccggcgatcatgtgtgctcaaccgctgaacggcccgcgtcctgcccagcagctggtgctcaacaccgtgctcaagcgcgact  
ggcgtacaagggctcgtcatgctggactggggcgcggtgcccgggcttgaggcggccacggcgggctggaccagcaatcggggga  
acagcttgacaagggcgtctatttcggaagcaagctggcggacaagggccacggacaagcctggggcggcgcgctggcagacatga  
accggcgctgctgaccgcatctatgccaggggggtgacaagaatccggtcagcccagggcgagtgaggatcaggtgccattcc  
ggcgtggccgaaaaggcggcgattgccggcaggtgctgctgcaaccagaacaacgcgctgcccgtgttgcgctgccaagagcgtg  
gggtgatcggcggtatgccgatggcgctgctcggcggtggatcagccaggtgagggcgatggcgcccgggtggttccg  
cccgtgctggcgggggatgttgggggatcagcaggaacagttccaccgctccagcccgtcagcggatcaaggcgcgctgccc  
gcagggcgatgacattccgatggcgctatcggcagcgggtggaggcggcgccggctgacgtggccatcgtcttccact  
gaatggcaccgaaggctggaccagcccactgctgctgcccgatggcagggcagcgtgatcggcgagtgggcgggccaatc  
cggcaccatcgtggtgctgaaaccggcggcgggtggcctatccctggctggacaagaccggcggcgtgctcaagcatggtaccc  
ggcgcgcgggggggaagcagatcgaaggtgctgttggggaggcgaacccggcgccgctgcccgtcacgttccggcagc  
tcgcaattgcccggccaagctggatggcagcgcacgctcgtatcccattcatgggcaaccggcggcggcgaaccacgctca  
aggccgattacaatgctgagggctccgactgggctatcgtggttcgcgggaccgggccaagcgtgttccgttccgctatggcctg  
agctacaccaccttggccaagcgggctgagcgtggatggcaagaccgcgctttaccctgcaaacaccggcgaaggtggcggtgat

gacgtggggcaggtctatctggtcgtcgcgccggcagcgccaagcgccgctggtgggctttgcccgctgcatctggagccggcgag  
agcaagacgggtgagcgtgccgatccgcctcttggccgattggcaggacgccgggaaggcggggtggacgatccaagccggga  
cctatggctttgccctgggcagcgtgccgagacctgggccagggtggtgactgtcgcctgccggcgctagctggaaggattga

>sbgl2

aaggttccaaggctgccgtgcgccacgtcccgagggttctgtggggcgctccaccgcccgcaccagatcagggcaacaac  
accgccagcgtctgtggtcatcgagaaccagcagcccaccgttctcgcgcgccgtcggcgatcgggccaacagcctgctgtggtg  
agcaggatctgacctggccaaggcatgggctcaactgctatcgttcggcatcgaatgggcgcgatcgagccgaaaaggcctgtt  
ctcgcagggcatgctgatactatgctcgcgtgacggctgccgcgcgcggcctcggccgggtgacgttcagccactttaccg  
cgccgcgtggtttccgcgcaagggtggctgggccaatccgaaagcgcgagcctgttcggccgctttgccgacaaggcgcccgtactt  
cgcgaccgcatccacggcgatcaccttcaacgaaccaacatcctgctgctgttgagaacccaatgtccggcgaactgtgggat  
atccagaagctgacgctggaaccgctccaagcgctgggctgcccagcttctctcgcgcaacgtggcgggcaaggacgatgcc  
gatctgaacggggctgctcggcgcaagggcggaaggcgccgatcaaggcgccgcccagcctgccggtgggctctcgc  
tggcgatgatggagaccaggcggtggccagggttcgacgcgcgacatcgccgccagcagatgacggcacctggtggacgtggc  
aaggcagacgattctcggcgtgcagaactacgaacgcgcgtgtggggcgccgagggccgctgccggcgccggcgatcggtggt  
caactggtccggcagcgaagtgtggcgccctcgtggcgggcactgtgcgctatgccacggccaccggcgtgccgatcctggtcag  
cgaacatggcgtgggaccgatgacgacagatccgcgccggttcatccccgccgctcaccacctgaaagccgcgatcgatg  
gctgcccgtgctcggctattgccactggagcctgatcgacaacttcaatggatcttggctacaagccaagttcggcctggcagctatg  
atccggtcaccttccccgcaccccaagcccagcgcggcctgctggcgccgatcgcgggccaatcgctgtga

>sbgl3

atgatcgtcagcagcctggtcacctcggccatggccctgggcttccaccgcatggagagtgtggcacattggccaaggcagcg  
ggcgcaaacggattgatccccggttcccggcgttctgtggggggcatccacggcgccatcagggtggaaggcaacaatataacg  
ccgacctgtggtgatcgagaacctcggggcacgatgttctgtagcgtcggggcagcggcgaacagcttgaactatggccgaccg  
acctgaccttcccggaaatgggctcaattctatcgttcagcctggaatgggcgccgatcgaaccggacaaggggcaactttcaac  
gcatgctcgtactacaaggcgtgatcagggctcggggcgccgggctccatcccgtggtcacttcaaccacttaccacggcgc  
gtggtttccggccagggtggatggcatatgccgaatccccgatcttggccgcttctgacggcgccggcgccatctggccggc  
ggaatcgaactggcaccacgctcaacgaaccaactggtgggggtgatcggcgaatcctgcccgccgctggttggcgggtgacct  
gcatgagcaggaagccggcgccagcctggcgttccgctctatcgccggggctggcgctttatgtccagatccaagctctatcgcg  
caacatgatggaagccatcggcgccgggtggccgcgatcaaggccggcgccggcgctcgggtggcggtgagcctggccatcctc  
gatgaccagggccgggaccgacttcatcgcgaccagatccgtgagcgttattggcgaatggctcggcttggcgagacctgc  
gatttctggcggtgcagaactatgagcgaaggtctgaccgacaagggcgcgctgccggccagccgatcccggcgcaaccac  
cggggcggaagtctggccgggttcgctggccggcgccgtacgctatgcttgggaagcgaccaggctgccggtctacgtcaccgagcacg  
gctgtaacaccgatgacgatacactcgcgaatggctgatccccggccttggctgaactcaagcgccgatggacgatggcgtccgg  
tgcgggctatgactggtcgtcgtcgacaattcagtggtgggcttggctatgccatcgttggcctgcacgcctttgaccgagac  
gttctgctgcaccgcaagccgagcgcggcctgctgggcccacatccccggcgcaacagcctgtga

>sprha2

gagccggcaccgatcgccggccagcccgggtccccggcgccggggcggtgcatgccggcatggcgttccgctcgtatgcaattccg  
cgatccggccttggccggccgcgctatggtggcactggatgaacggcaatgtcacacaggatggcatcgcaagacatcgactg  
gatgagccgatgggatggcggttgcaggcgttgcagccggctgatgacggcgaagtggctgacaccgctggttctatgctg  
cccgaatggaagatgccttccgcttggccgcagagcggcgtatgcgcggggctggaactggcaattgccttccggcgtggtctg  
aaaccggcgcccttgggtgcaaccggccgacgcgtcaagaaagtgggtgagcagaccgtggtgccggcgcaagccgctgtc  
cgctccgctggccggcgcccccacatgcaccggcacttccaggacatggaactgaacgatccgctggcgccgctgaccaaggaaggcc

ccgatcagcaccacgaattctatgccgacatgccgtgctggccgtgccggtggacgcggccggggccacgctgccgctgccggtgatca  
ccggcccgatggcaaggcgtggatgccgactgctgaccggtgacagctttccaagggcagatgggtccgcacggcaccgagcag  
caaccttcgggtgctggcgcggctgaccggccgagaccgtgcgcggggtcacgctgttctggccggagcaaggcatgttctcgg  
gcccgtgtcgcgccaggctggaagcagcagcagcggcagacctggagcaaatggccgatgtccggctacctcggccccgac  
cagcgtgagcttcgcggcgtcaccgccagccagtccgcgtgctgctggcccttgcggtcaagggtccaacctggcgatccggca  
ccgggcccggccaccgatgctggttcatgaagatgatggcggccggggccaccgcgcttgcacttgcgccacttccgctgcacggg  
gagccgcgatcaccggtcaggccaaggcgggttctccatcagcaggaactattacccttggcatgcccgatccggcgcggcc  
gggcccggatgccgtcaagggtggaacctgacaggcaagctgcgccccgacggcacgctggactggacaccgccggcgggagcgcct  
ggcgcactcctgcgcttggcaccagcctgctgggcaactaccaaccaccccgcagccccggaagcagccgggtggaagtggacaagtcc  
atggcgcggcgggtgcggcgtacctgacgactacttgggatgtatcgcgacgcgaccggccggaactgatggccagcatggcgtg  
aaagccctgctgacggatcgaagtggcgcggccaactggacgcccaagatgatcaccagtcaagcgttgcgcggctatgatc  
ccacccctggctgcgacgctggccggcgtgctgatcggcagccgcggcggatgccaccgttctctatgactggcggcagcgtcgc  
cgatctgctgcctcggagcattatggcatggtggcgaagtggcgcagagaacggcctcaaggtctacggcagggcgtgagggaca  
ccggccgatgctggcgatgacatggccatgcatgcccgatgtccgatggcggcgtgtggaccttggccgcgagacggggc  
cgaacccagctatctcggcagatgaaggcggcctcggctgcgcacgtctatggcagaacctggttgcggctgagtcacatgctc  
gacctggcggcctggcctacacgcccaaggacttgcggcggatcgcacctggaattcgcagcgggatcaaccgcccgggtggtgcac  
acctggtccaccagccggtggacgacaaggtgccggcctgctgctgatgatcttggccagttctcaaccgccacgaaagtggggccg  
agatggcgcggccctgggtgattacatggcgcgaattcgtgctgttgcagcaaggcgcgaacgtggccgatgctcctattctatggcg  
aggaagccccactgaccggcttaccgcaaggcaccggtggccgatgcccgaaggccaacgctatgacttgcctaatgccagcgcg  
tgggtggcgtgctgcaaccaaggcaactcgtcagccagggcggggcagcgtatcgcggtctacctggcgggtcgtcgcgga  
tgatgacgtcaagacctgcggcctcggcaactggtggatggtggcggccaggttaattggcctggcggcaggggttccccgct  
cgacgatgcgcaaggcggcaaggcggcggagtgagcaactggtggcgcggctctggccaggcagcggcgaccacgggtggca  
agggccgctgattgcgttggccgatgctgacggcggctggcgcggctggcgctggcggccgattccggctggtggcgcaagcgt  
gcccgaagtccgttgcaccgcaactcggcggatggcggcctggttctggtcaaccggcgaaccgcatgaaacgttgcagggc  
cattccgctcaccggcaagcagccccagctgtggcagccgacagcggcaggggtgagccggtatcgtggcgacgcgagaacggcg  
aaaccatcgtccgctcagcctcggcgggaaagtccggtcttctggtgttccgcaagccggccacgaccacccatggcgaagtgcgggc  
ggtgcatgacatgccgctcggcactctcggcggcggcagccgatcagccgcaagtcgcgcatgccgctggatggtcgcgttcca  
ggccggcgggggtgcggccttgcgtggccatgctaccttggcgcggctggaccagaatgccgcggcggcgtgctatttctcgg  
catcgcgacctatcccgcagcttccgctcccaagggctggaagaaaggccagccgctgtggctcgaacctgggtgaagtgcacgatatt  
gccaagtcactgtcaacggcagcatcggcagcagtggtggcagcgcctatcgttctgatgctggcagcgcgggtgcacaatggcacc  
aacgcgatccaggtgcgctggccaatagctgggtcaaccgctgatggcggatgcgagccccggcggccaccaaggtgacctggaccg  
gattcccactacaatccgatccccgctgcgacctcgggctggtggccggcgtcagctggcagaccgctga

## References

1. Q. Lan, T. Tang, Y. Yin, X. Qu, Z. Wang, H. Pang, R. Huang and L. Du, *Food Chem.*, 2019, **295**, 563-568.
2. L. Du, Z. Wang, Y. Zhao, J. Huang, H. Pang, Y. Wei, L. Lin and R. Huang, *Appl. Microbiol. Biotechnol.*, 2014, **98**, 7069-7079.
